# Supplementary material
Source: MDPI journal article supplement (https://www.mdpi.com/2077-1312/11/9/1766)
Supplement: s1 [file s1]

Archive with 4 entries (4 files):
- jmse-2569163-supplementary.pdf
- Video S1.mp4
- Video S2.mp4
- Video S3.mp4
