# Supplementary material
Source: MDPI journal article supplement (https://www.mdpi.com/2077-1312/11/9/1766)
Supplement: s1 [file s1 › jmse-2569163-supplementary.pdf]

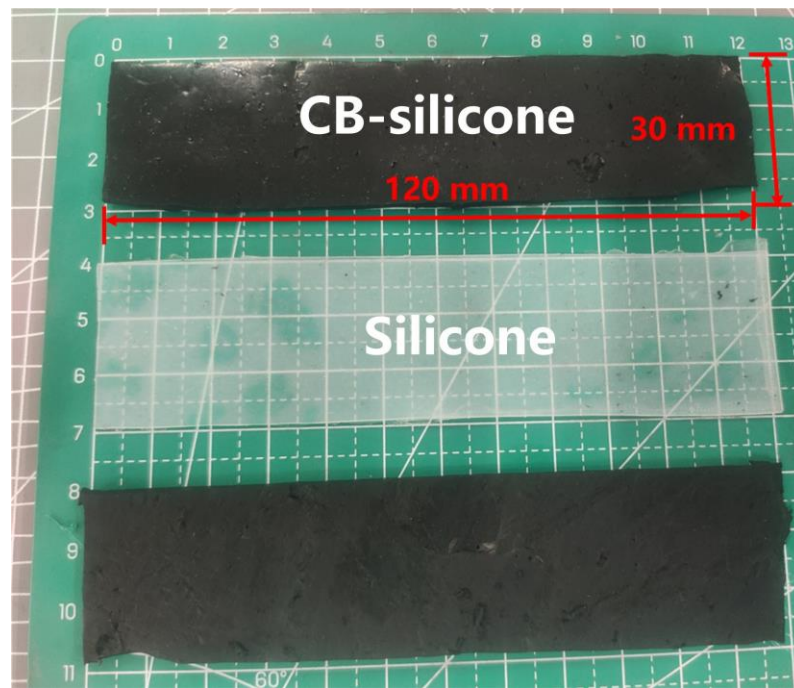

**Figure S1.** UF-TENG device physical diagram.

---

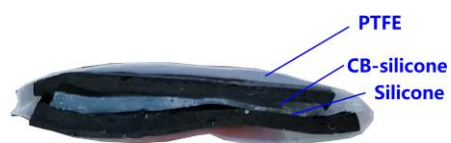

**Figure S2.** Cross-section of UF-TENG.

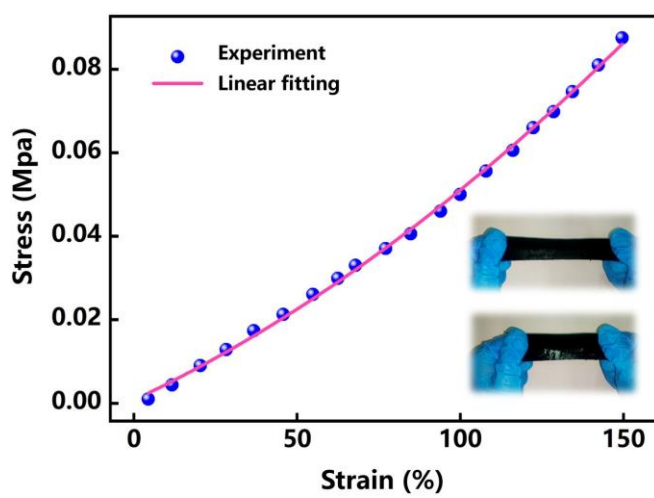

**Figure S3.** The tensile-strain curve of the CB-silicone electrode.

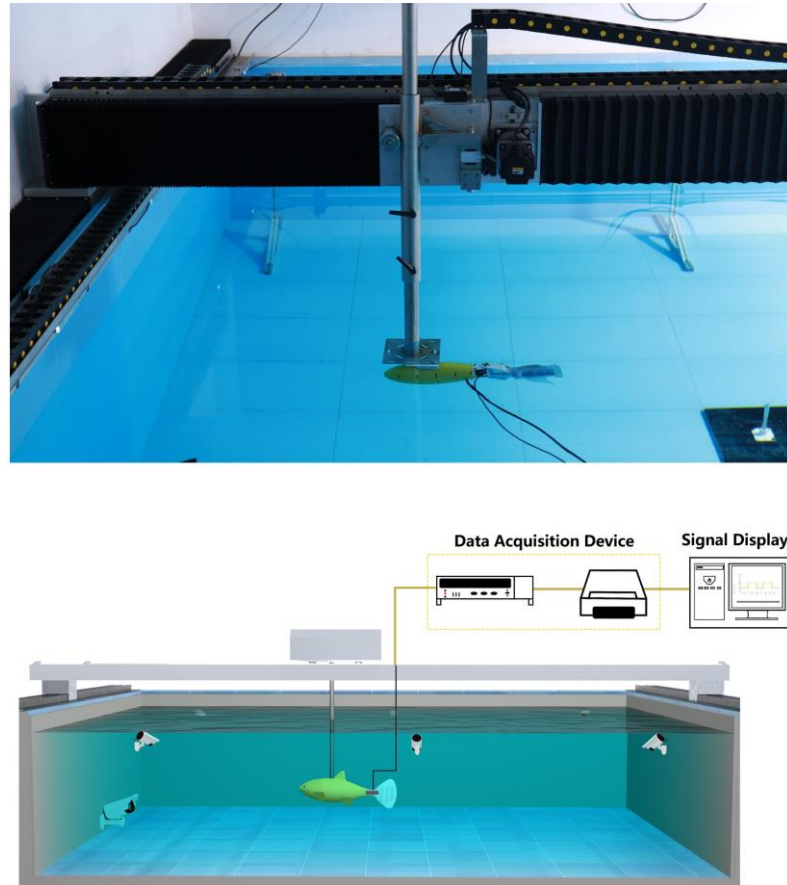

**Figure S4.** The contrast relationship between UF-TENG signal and fishtail swing posture.

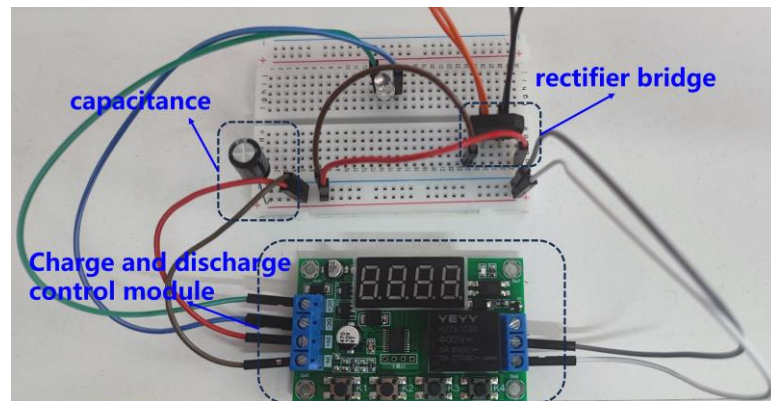

**Figure S5.** The contrast relationship between UF-TENG signal and fishtail swing posture.

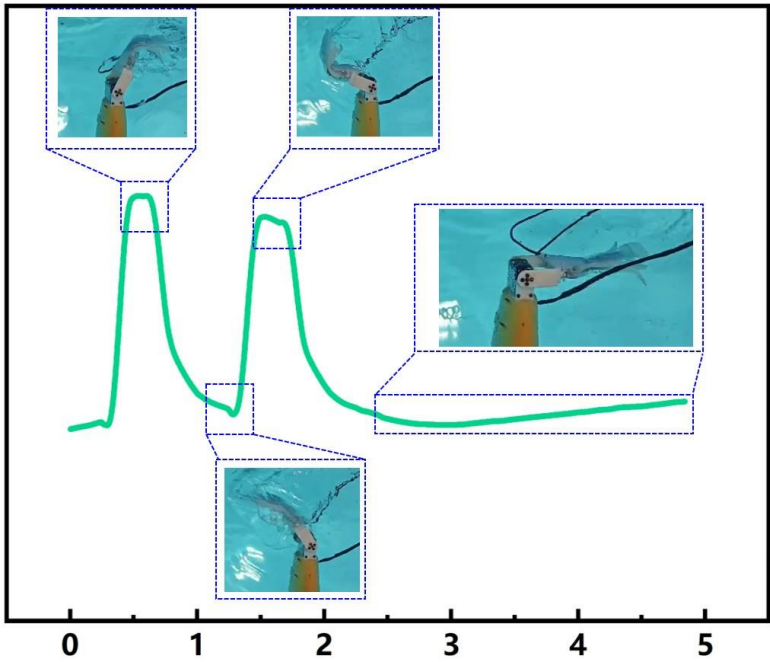

**Figure S6.** The contrast relationship between UF-TENG signal and fishtail swing posture.

**Table S1:** The attributes of the light-emitting diode

|              |                                   |
|--------------|-----------------------------------|
| Product Name | F5 White Hair Blue                |
| Foot length  | short foot 18 mm/ long foot 28 mm |
| Wavelength   | 460-465 nm                        |
| Brightness   | 5000-7000 MCD                     |
| Voltage      | 3.0-3.2V                          |
| Current      | 20mA                              |
